# Supplementary material for: Detection and partial discrimination of atypical and classical bovine spongiform encephalopathies in cattle and primates using real-time quaking-induced conversion assay
Source: PubMed Central journal article supplement (PMC5322914; doi:10.1371/journal.pone.0172428), 2017-02-23

S1 Fig

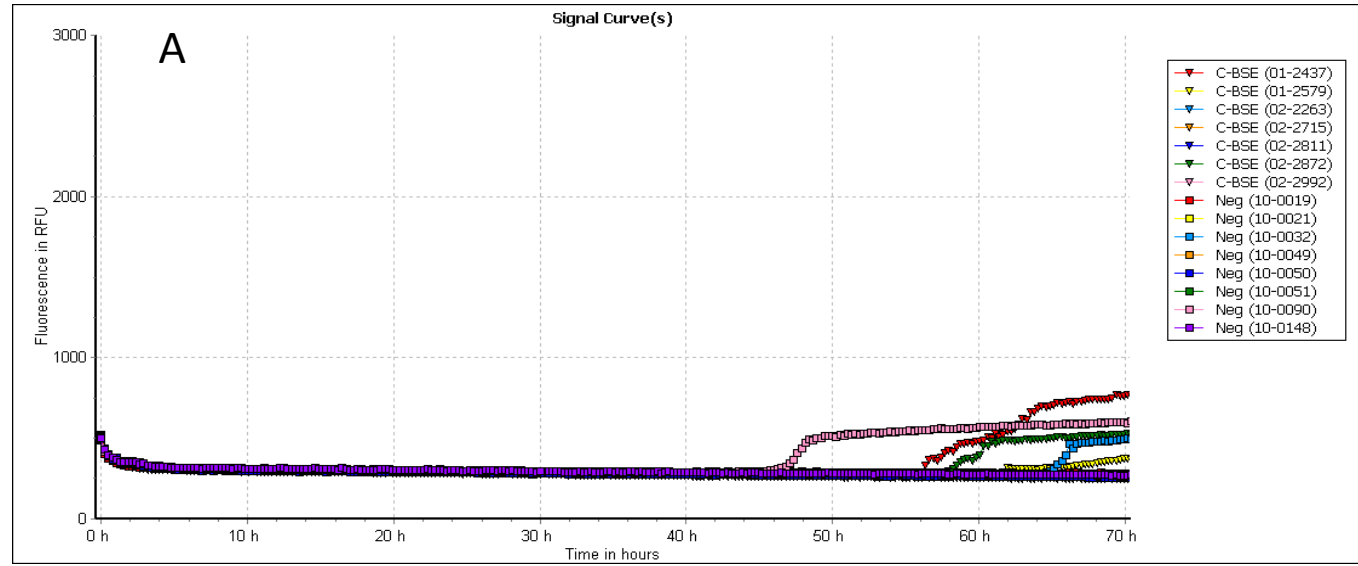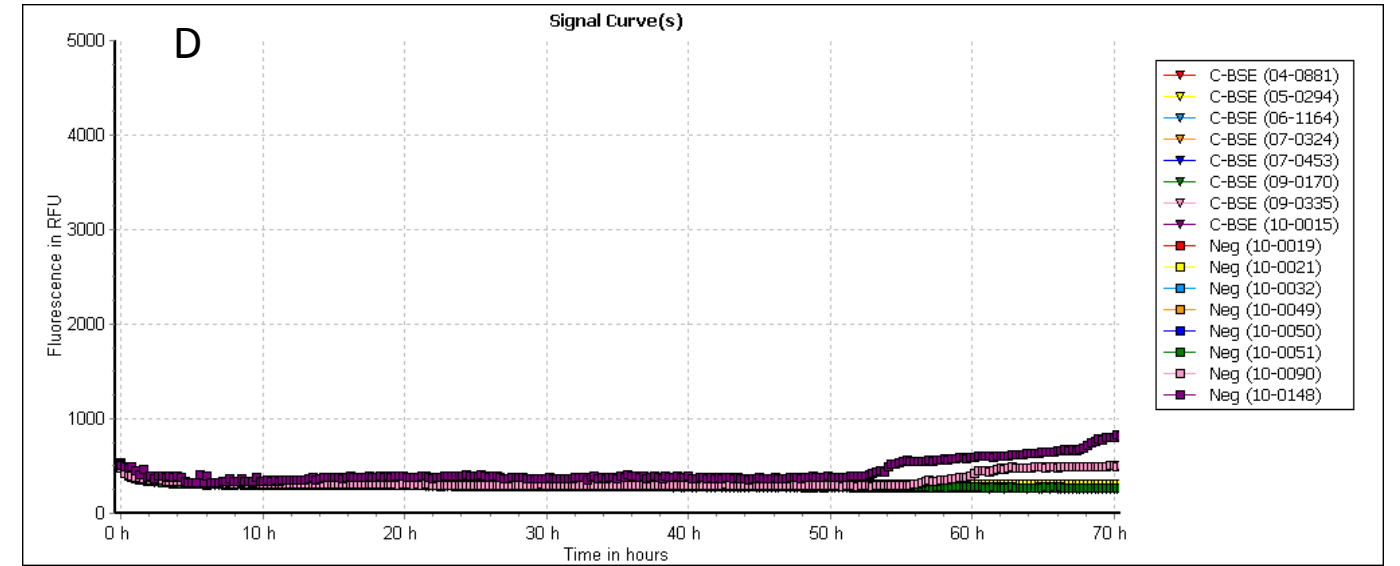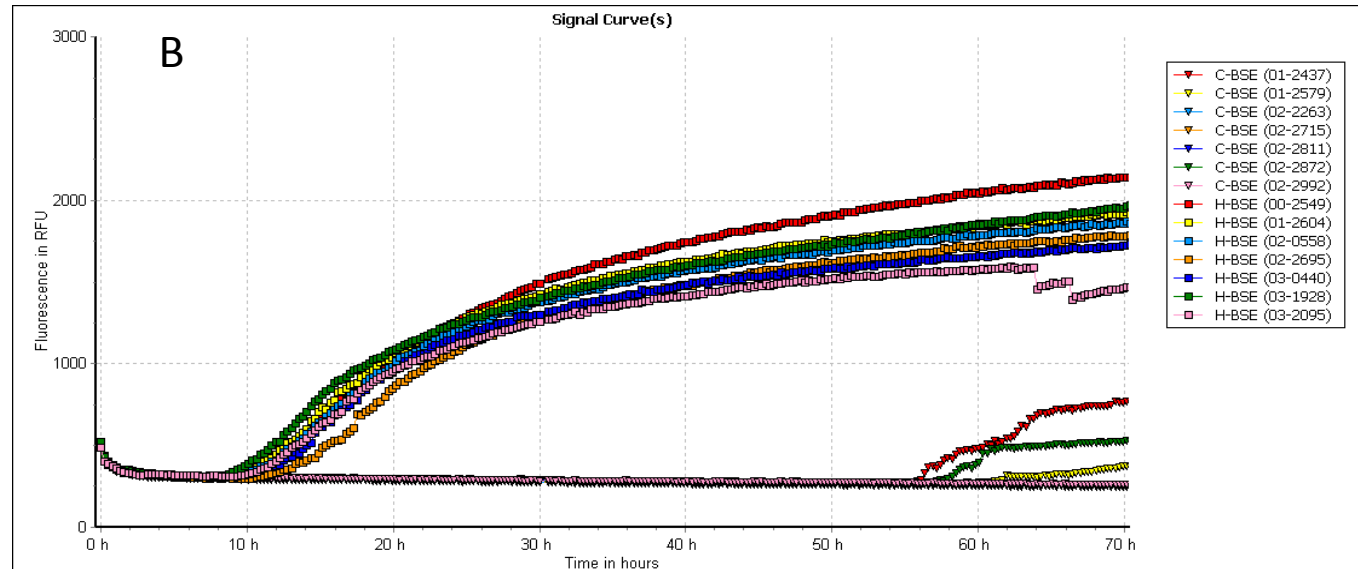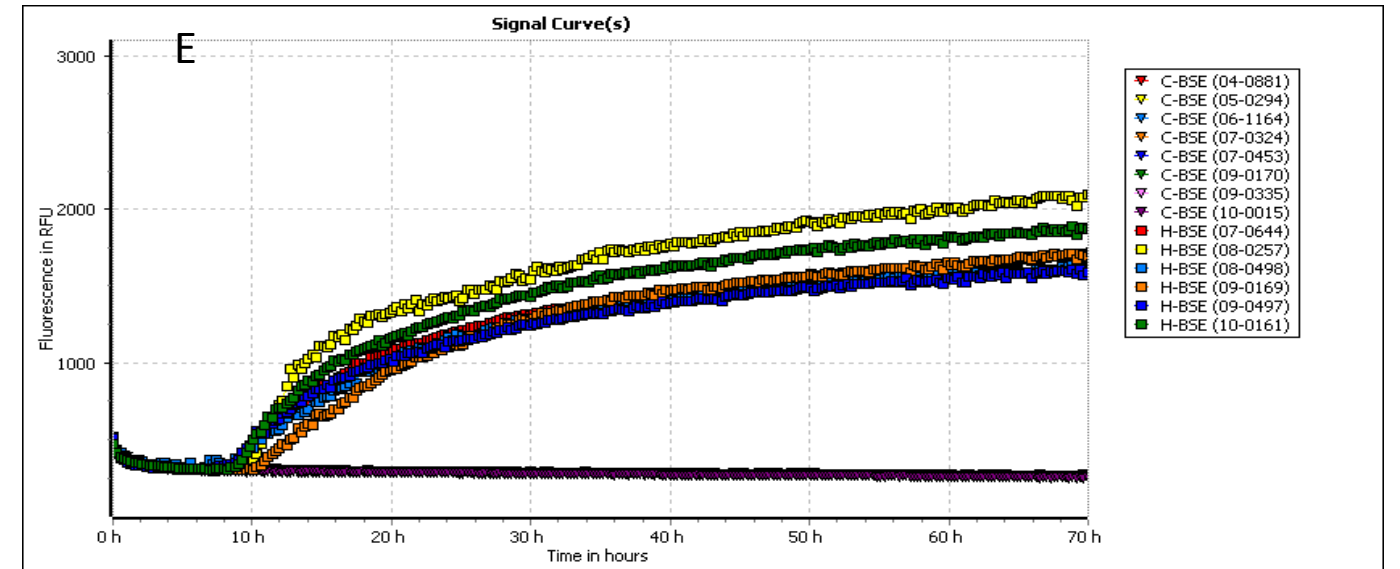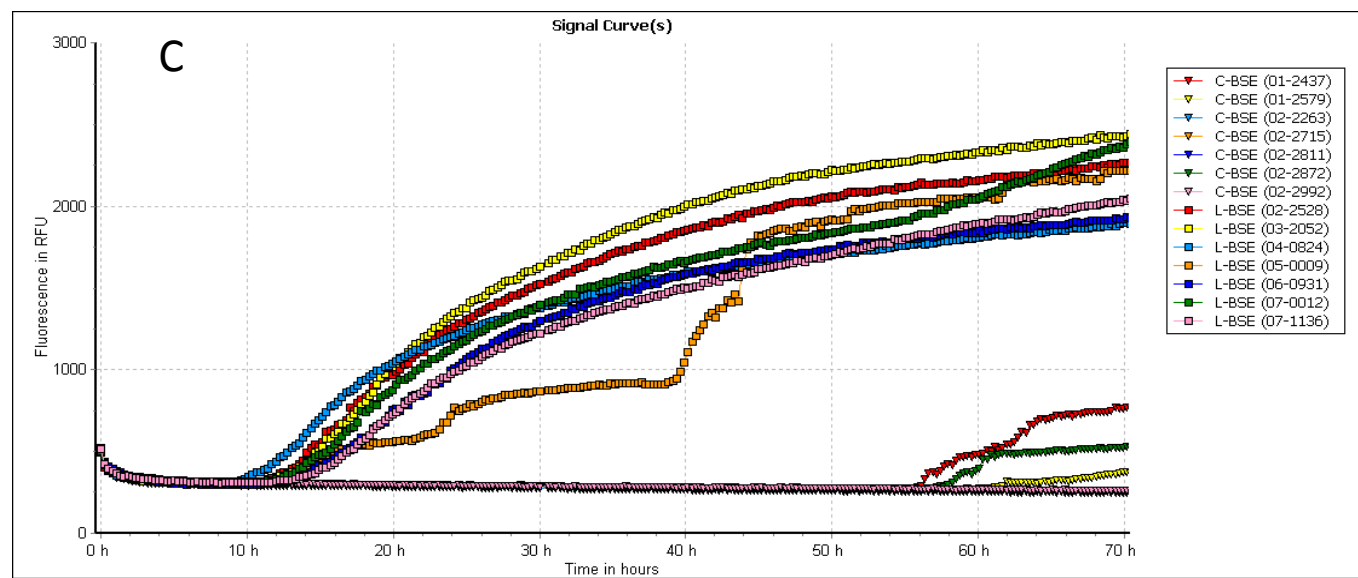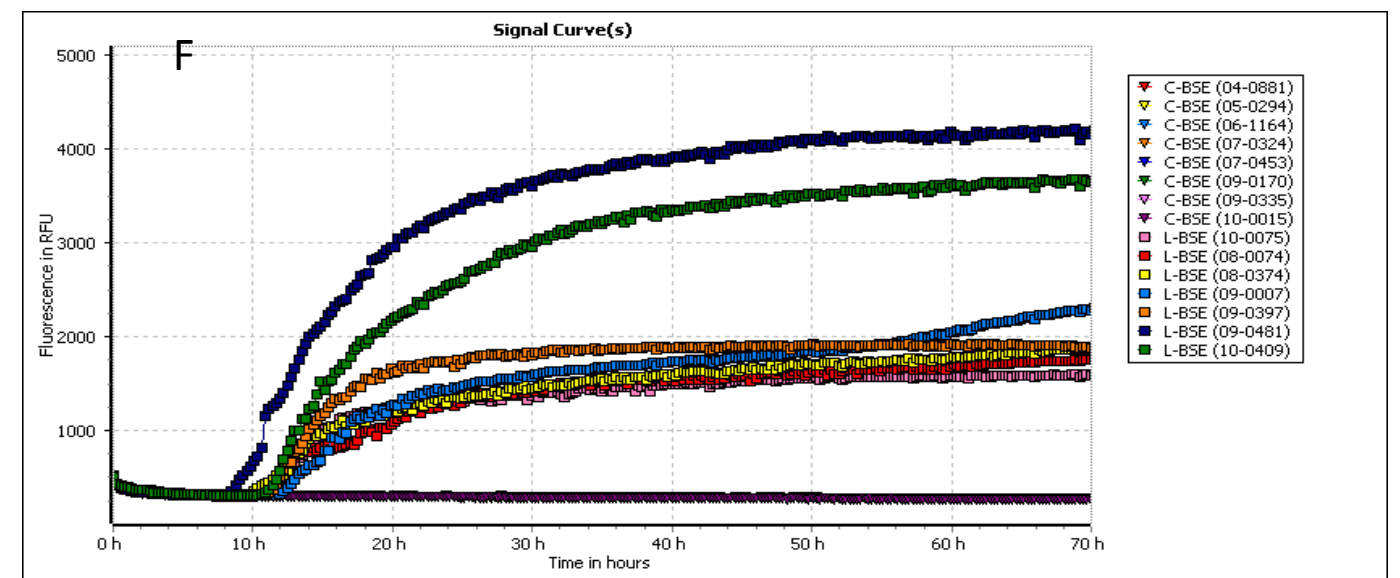

Supplement: pone.0172428.s001.pdf [file pone.0172428.s001.pdf]
